# Supplementary material for: Organic solvent-free production of colloidally stable spherical lignin nanoparticles at high mass concentrations
Source: Royal Society of Chemistry journal article supplement (doi:10.1039/d2gc02316d), 2022-01-01
Supplement: d2gc02316d1.pdf [file d2gc02316d1.pdf]

Supporting Information

Organic solvent-free production of colloiddally stable spherical  
lignin nanoparticles at high mass concentrations

*Ievgen Pylypchuk,<sup>[a]</sup> Mika H. Sipponen<sup>[a]\*</sup>*

<sup>[a]</sup>Department of Materials and Environmental Chemistry, Stockholm University, Svante  
Arrhenius väg 16C, SE-106 91 Stockholm, Sweden.

\*Corresponding author: [mika.sipponen@mmk.su.se](mailto:mika.sipponen@mmk.su.se)

THIS FILE CONTAINS

Table S1, Figures S1–S9

**Table S1.** Characterization data for the lignins.

| Lignin type                  | M <sub>w</sub> , Da | Ph-OH, mmol/g                  | Aliph-OH, mmol/g | COOH, mmol/g | Dispersity, Đ (M <sub>w</sub> /M <sub>n</sub> ) | Klason Lignin (Acid insoluble lignin) % | Ref.   |
|------------------------------|---------------------|--------------------------------|------------------|--------------|-------------------------------------------------|-----------------------------------------|--------|
| SKL                          | 5250                | 4.21                           | 1.93             | 0.56         | 4.4                                             | 92                                      | 1      |
| Lignosulfonate DS10          | 10482               | 0.83                           | 3.27             | 0.74         | 5.2                                             | 96                                      | 2      |
| Organosolv beech             | 3433                | 2.14                           | 4.075            | 0.65         | n.a.                                            | 88.56                                   | 3      |
| Lignosulfonate Sigma Aldrich | ~52,000             | 2.28 (SO <sub>3</sub> H: 1.86) | 2.18             | 0.18         | 7.42                                            | ~90                                     | 4<br>5 |
| Soda lignin, protobind 2400  | ~4323               | 2.71                           | 1.34             | 0.59         | 7.5                                             | 90                                      | 6<br>7 |

## References

- Moreno, A., Morsali, M. & Sipponen, M. H. Catalyst-Free Synthesis of Lignin Vitrimers with Tunable Mechanical Properties: Circular Polymers and Recoverable Adhesives. *ACS Applied Materials and Interfaces* **13**, 57952–57961 (2021).
- Abbadessa, A., Oinonen, P. & Henriksson, G. Characterization of Two Novel Bio-based Materials from Pulping Process Side Streams: Ecohelix and CleanFlow Black Lignin.
- Lê, H. Q. *et al.* Solubility of Organosolv Lignin in  $\gamma$ -Valerolactone/Water Binary Mixtures. *ChemSusChem* **9**, 2939–2947 (2016).
- Lignosulfonic acid average Mw 52,000, average Mn 7,000 8061-51-6. <https://www.sigmaaldrich.com/SE/en/product/aldrich/471038>.
- Musl, O. *et al.* Mapping of the Hydrophobic Composition of Lignosulfonates. *ACS Sustainable Chemistry and Engineering* **9**, 16786–16795 (2021).
- Liu, J. *et al.* Fully Biobased Photothermal Films and Coatings for Indoor Ultraviolet Radiation and Heat Management. *ACS Applied Materials and Interfaces* **14**, 12693–12702 (2022).
- Adjaoud, A., Dieden, R. & Verge, P. Sustainable Esterification of a Soda Lignin with Phloretic Acid. *Polymers* 2021, Vol. 13, Page 637 **13**, 637 (2021).

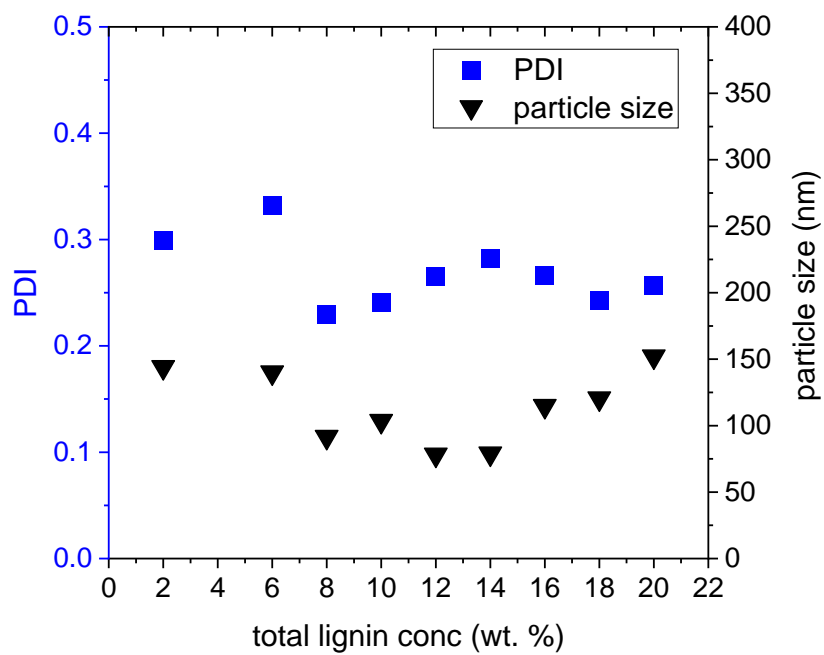

**Figure S1:** Polydispersity indices (PDI) and particle diameter as a function of lignin concentration in the mixed colloidal dispersion at a constant LS to SKL ratio of 4:1 (w/w).

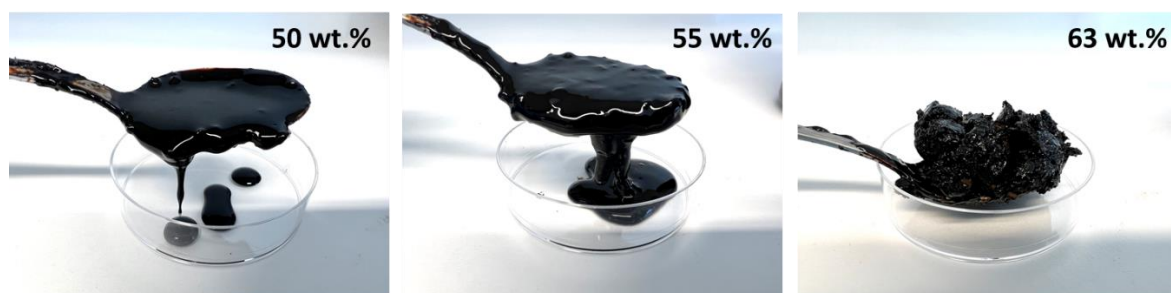

**Figure S2:** Visual appearance of LS-SKL (5 to 1 w/w) mixtures in 2 M NaOH at different total lignin concentrations.

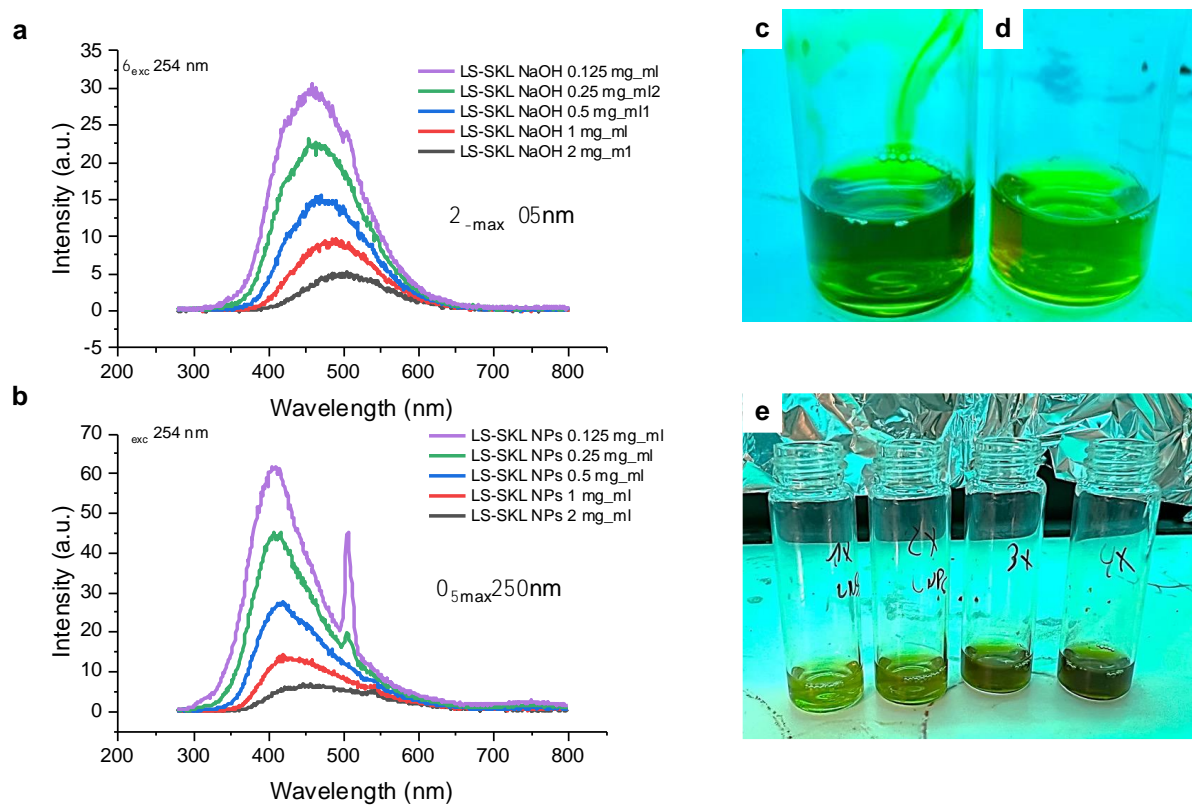

**Figure S3:** Fluorescence spectra of LS-SKL mixtures in 2M NaOH (a) and of dialyzed LS-SKL NPs (b) and their photographs taken under UV-light (254 nm) (c) and (d), respectively, and (e) photographs of LS-SKL NPs at concentrations increasing from left to right.

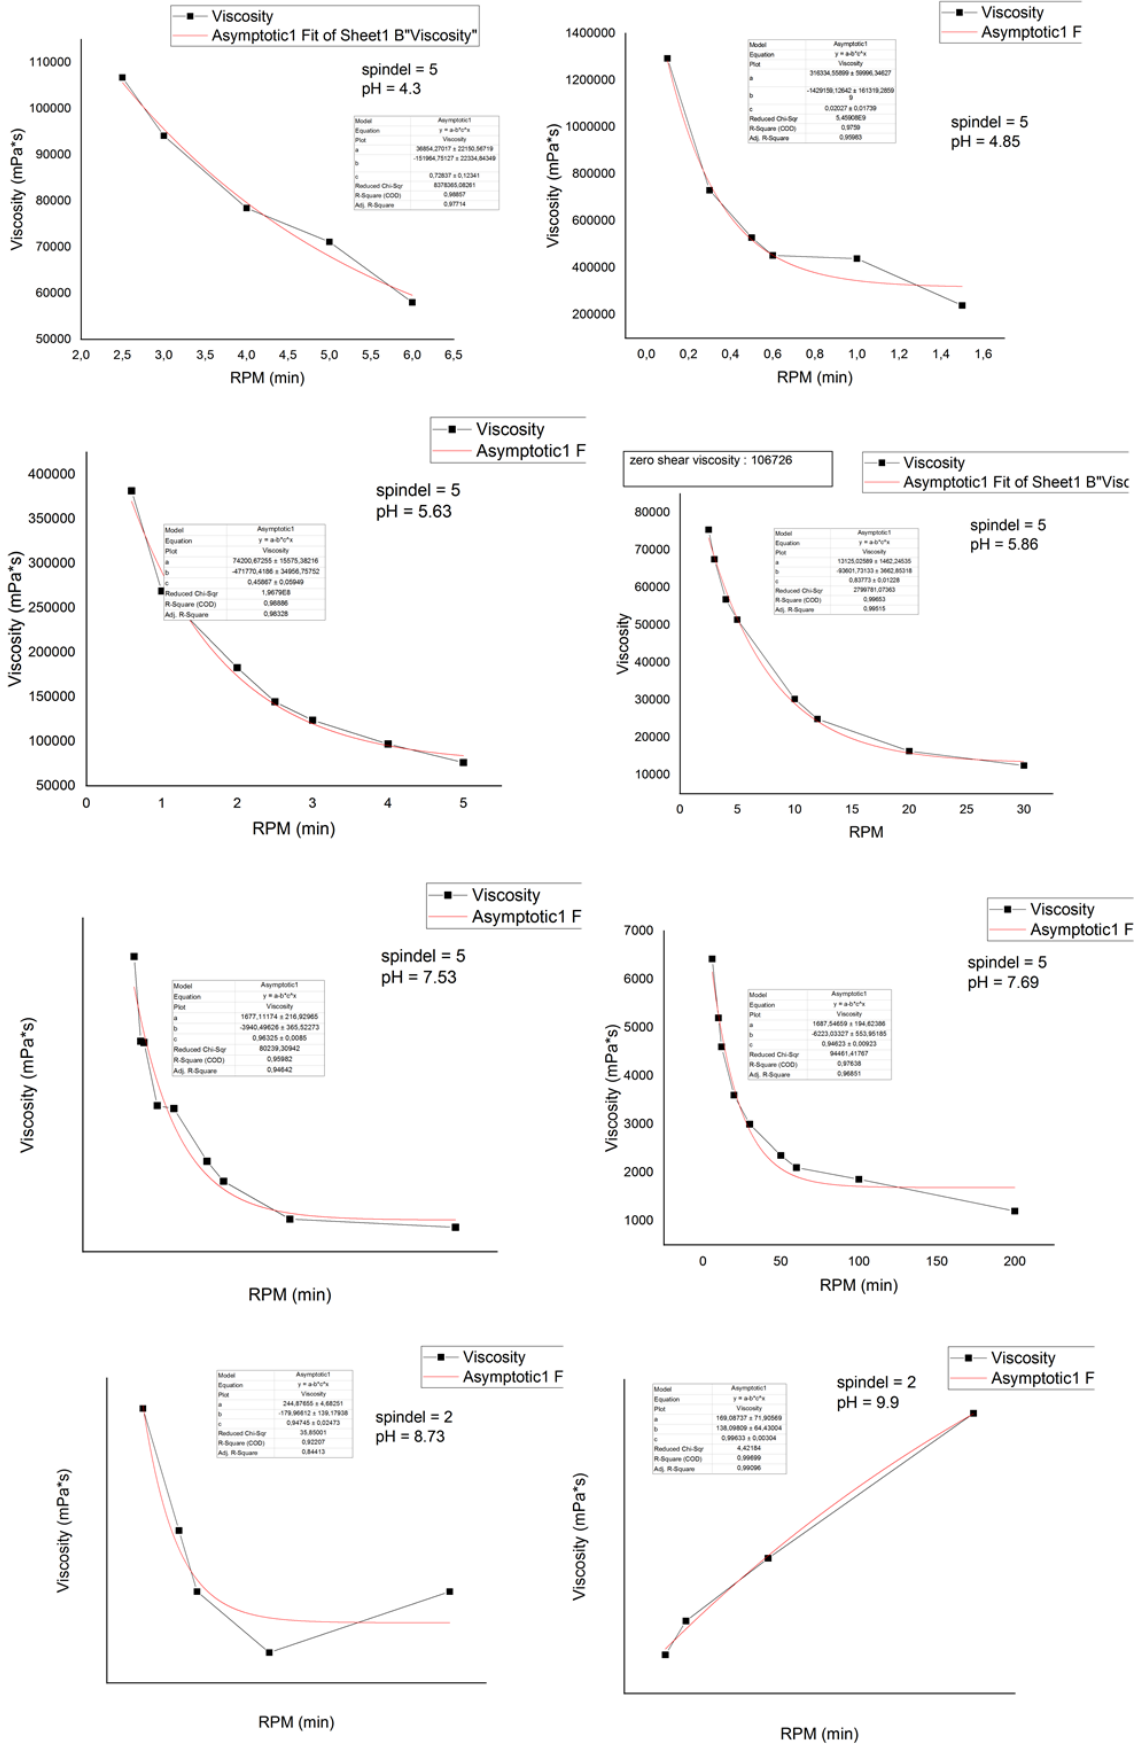

Figure S4: Dynamic viscosity data used to calculate values in Figure 3.

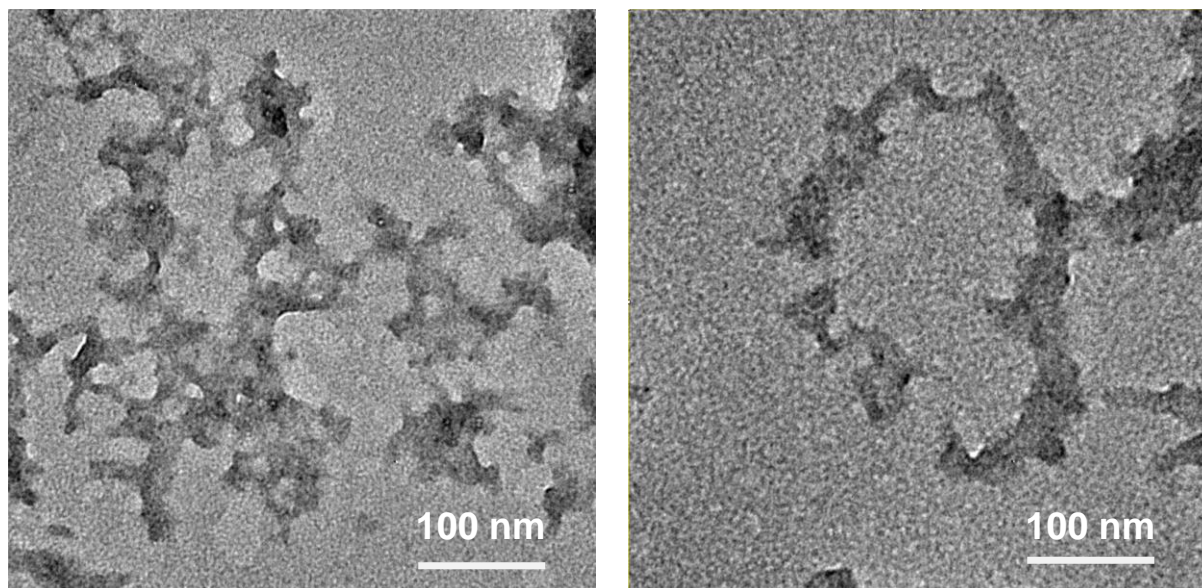

**Figure S5:** TEM micrographs of precipitating lignin aggregates of LS and SKL at weight ratio below the optimum.

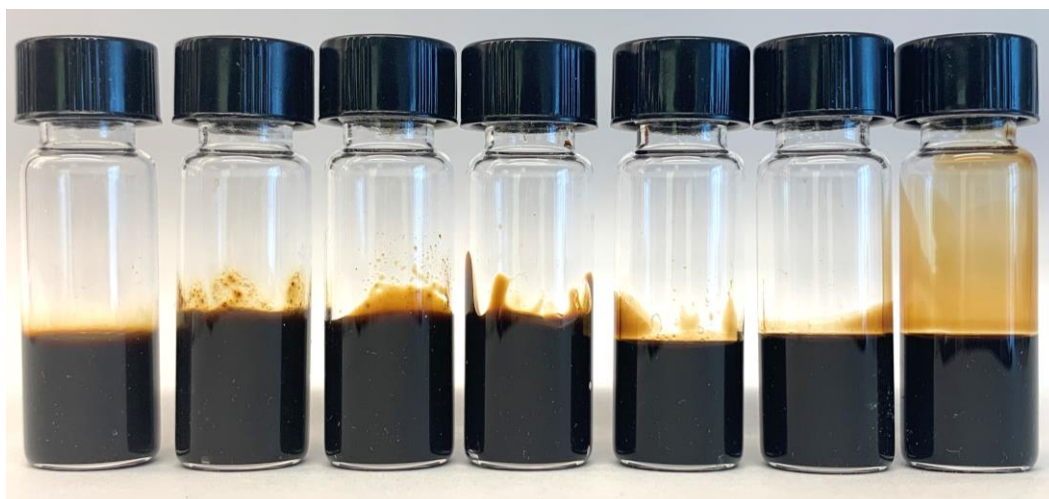

pH      4.3            4.9            5.6            5.9            7.5            8.7            9.9

**Figure S6.** Appearance of the LS:SKL (5:1 w/w) dispersions at various pH levels studied.



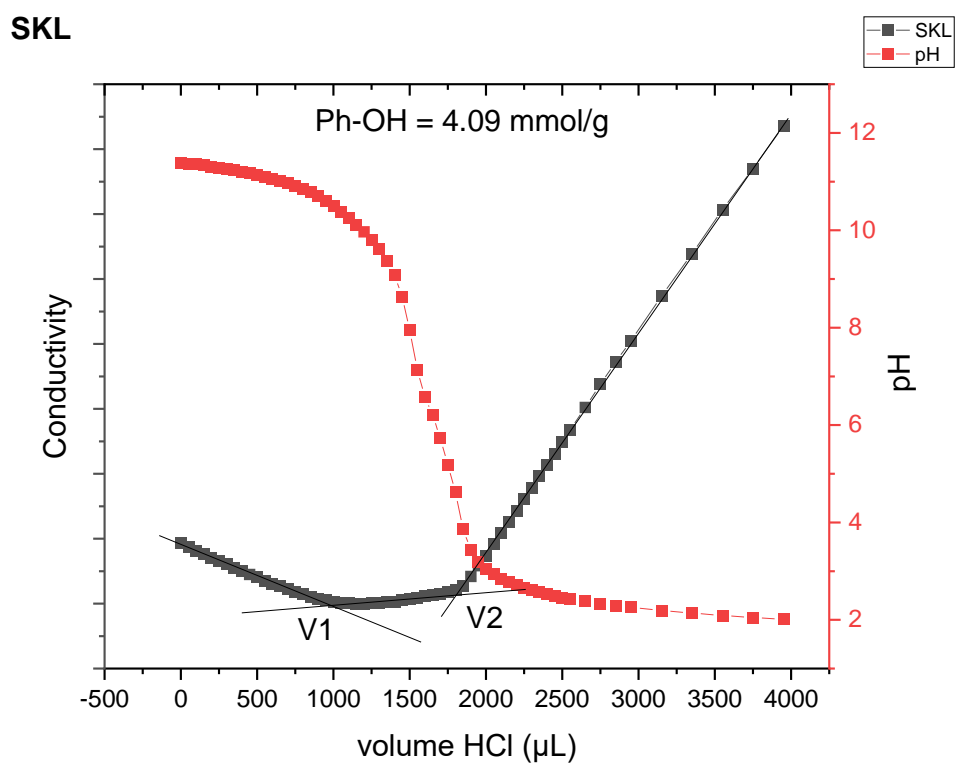

**Figure S7.** pH and conductometric titration curves of SKL solution.

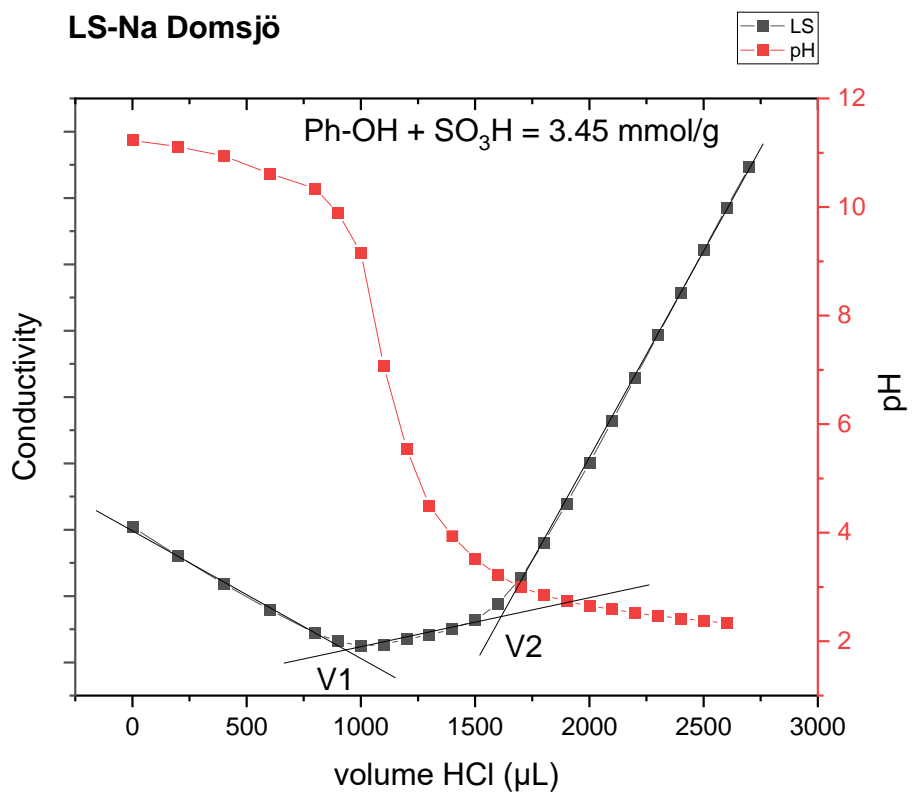

**Figure S8.** pH and conductometric titration curves of sodium liginosulfonate solution (LS Domsjö).

### LS/SKL mixture (5:1)

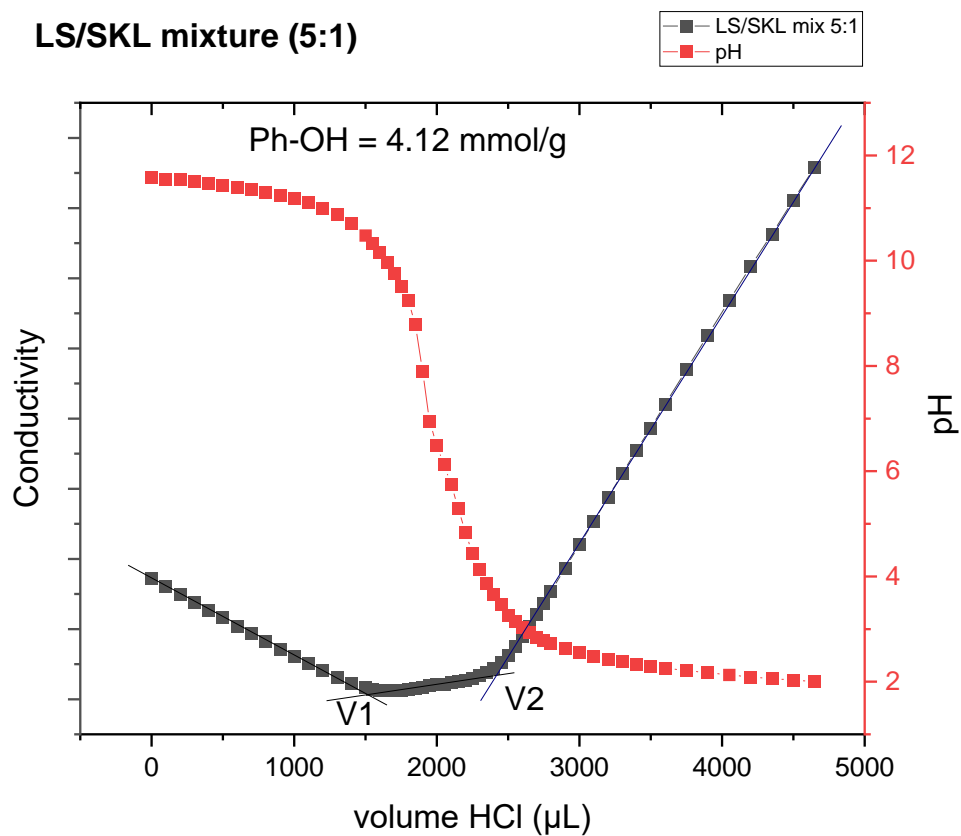

**Figure S9.** pH and conductometric titration curves of a aqueous mixture of SKL and sodium lignosulfonate solution (LS Domsjö) with 5 to ratio.
